# Supplementary material for: Study on the solid–liquid equilibrium and thermodynamic model of the l-phenylalanine + l-tryptophan + water system
Source: Royal Society of Chemistry journal article supplement (doi:10.1039/d3cp05690b), 2024-01-01
Supplement: d3cp05690b1.pdf [file d3cp05690b1.pdf]

## Supplementary Information

### Study on the solid-liquid equilibrium and thermodynamic model of L-phenylalanine +L-tryptophan + water system

Weiping Liu<sup>1#</sup>, Hongfei Xiang<sup>4#</sup>, Yisong Wang<sup>3</sup>, Xia Li<sup>1</sup>, Yahui Yin<sup>1</sup>, Yu Zhou<sup>1</sup>, Xianzhen Xu<sup>\*1,2</sup>

<sup>1</sup>College of Chemistry and Chemical Engineering, Qingdao Application Technology Innovation Center of Photoelectric Biosensing for Clinical Diagnosis and Treatment, Shandong Sino-Japanese Center for Collaborative Research of Carbon Nanomaterials, Qingdao University, Qingdao 266071, Shandong, China

<sup>2</sup>Qingdao Marine Hydrogen Equipment Technology Innovation Center, Qingdao Boting Hydrogen Age Ocean Technol R&D Ctr, Qingdao Boting Technol Co Ltd; Shandong Hydrogen Times Marine Technology Co Ltd, Qingdao 266100, Shandong, China

<sup>3</sup>Department of Water and Environment, Qingdao NCS Testing Protection Technology Co Ltd, Qingdao 266736, Shandong, China

<sup>4</sup>Department of Orthopedics, Affiliated Hospital of Qingdao University, Qingdao 266003, Shandong, China

\*Correspondence: xuxianzhen@qdu.edu.cn (X.Z. Xu);

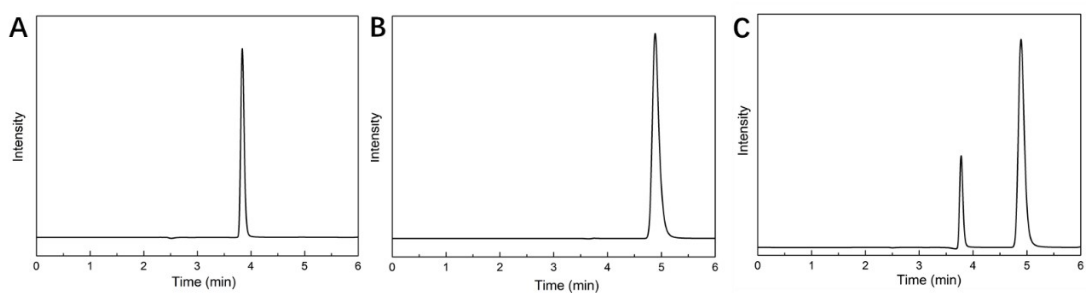

**Figure S1.** Liquid chromatography of amino acids. L-phenylalanine aqueous solution (A); L-tryptophan aqueous solution (B); L-phenylalanine + L-tryptophan aqueous solution (C).

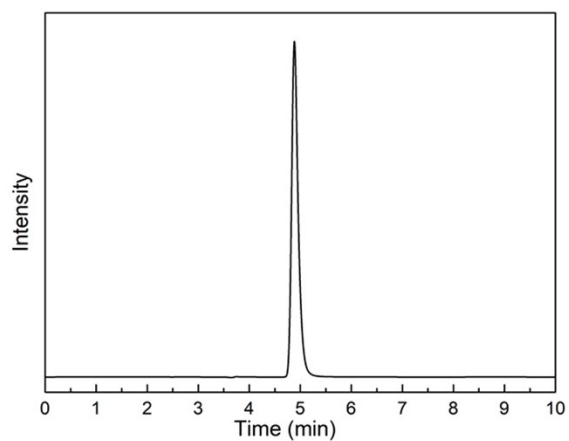

**Figure S2.** Liquid chromatography of the solid phases 1.

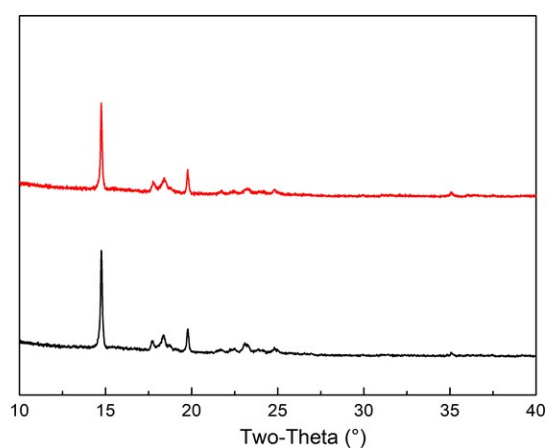

**Figure S3.** XRD pattern of wet residue (black line) and pure L-tryptophan (red line).

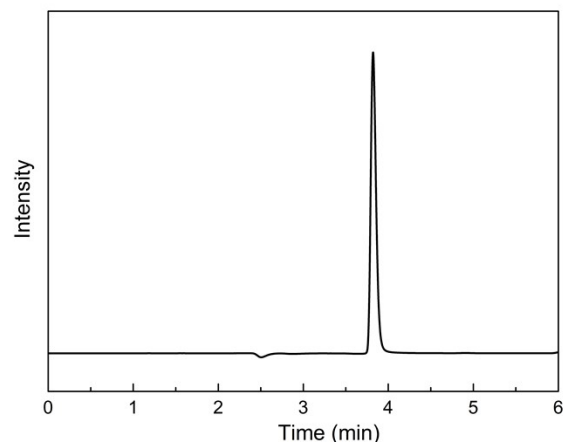

**Figure S4.** Liquid chromatography of the solid phases 2.

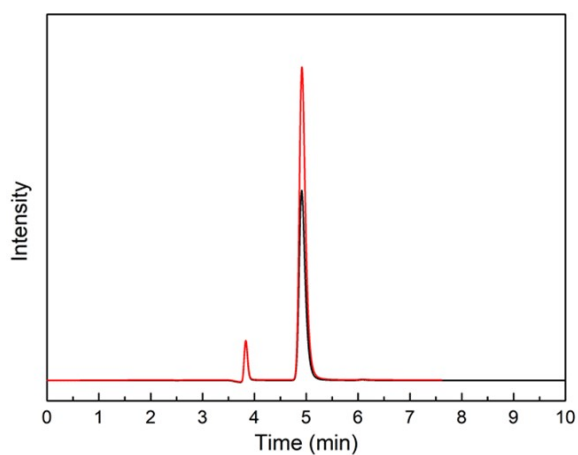

**Figure S5.** Liquid chromatogram of the supernatant at point E (red line) and D (black line).

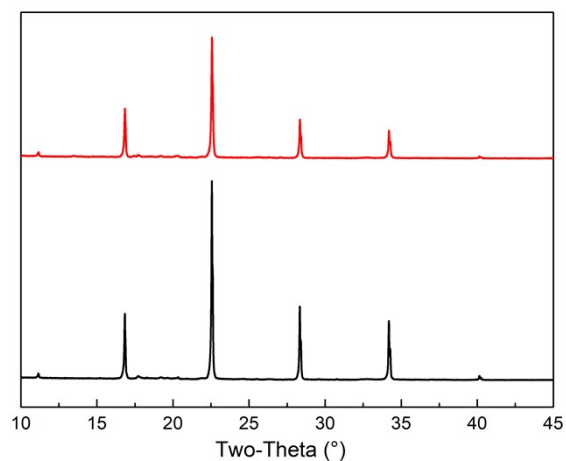

**Figure S6.** XRD pattern of wet residue (black line) and pure L-phenylalanine (red line).

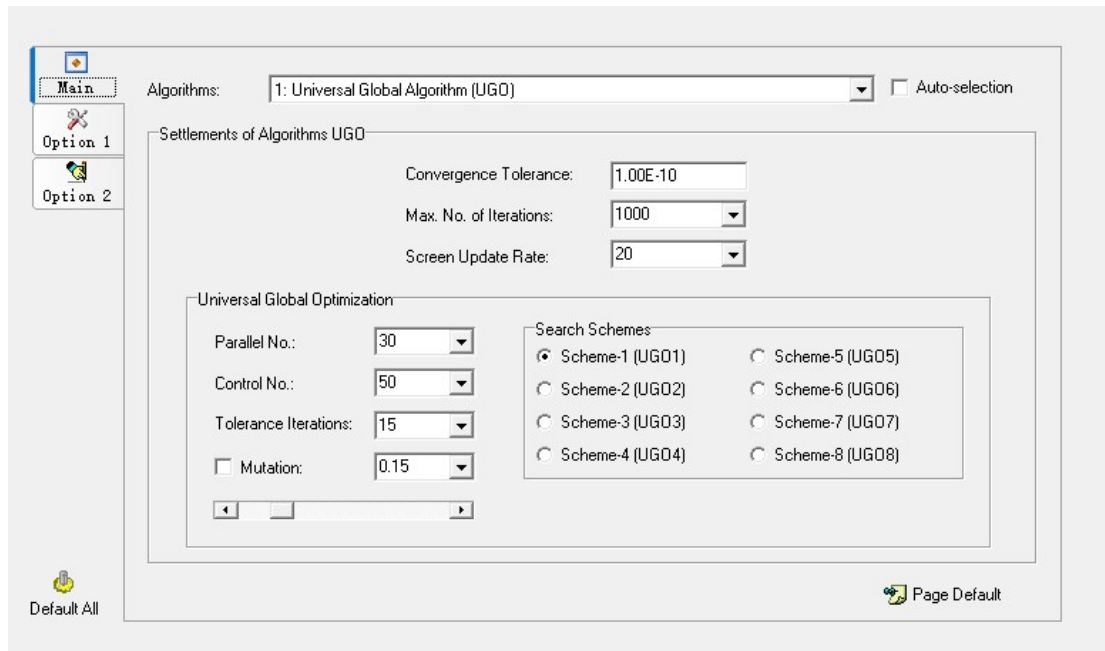

**Figure S6.** Calculation algorithm Settings.

```

1 Variable tp,ma,mb,lnr;
2 Parameter at12,bt12,at12a,bt12a; // ,k1,k2
3 Constant k2=0.5,
4 pd11= -0.0511550689218954,
5 pd12= 1.10536853197906 ,
6 pd13= -634.853403850243 ;
7 ConstStr pd1=pd11*tp+pd12*tp^0.5+pd13/tp,
8           p12=at12*tp+bt12*tp^k1, //+ct12/tp
9           p12a=at12a*tp+bt12a*tp^k1; //+ct12a/tp
10 Function lnr=pd1+(p12*mb+p12a*mb^k2 );

```

**Figure S7.** The calculation code of the correlation procedure for the precipitation of L-phenylalanine from ternary system.

```

1 Variable tp,ma,mb,lnr;
2 Parameter at12,bt12,at12a,bt12a; // ,k1,k2
3 Constant k2=0.5,
4 pd11= 0.00662618986028544,
5 pd12= -0.355918425585242 ,
6 pd13= 1319.44610441873 ;
7 ConstStr pd1=pd11*tp+pd12*tp^0.5+pd13/tp,
8           p12=at12*tp+bt12*tp^k1, //+ct12/tp
9           p12a=at12a*tp+bt12a*tp^k1; //+ct12a/tp
10 Function lnr=pd1+(p12*mb+p12a*mb^k2 );

```

**Figure S8.** The calculation code of the correlation procedure for the precipitation of L-tryptophan from ternary system.

```

1 Variable t,lnr;
2 Function lnr=p1*t+p2*t^0.5+p3/t;

```

**Figure S9.** The calculation code of the correlation procedure for the binary system.

**Table S1** Primary experimental data used to calculate amino acid liquid phase mass fraction by HPLC.

| <i>T</i> /K | L-phenylalanine (g/100 g H <sub>2</sub> O) | L-tryptophan (g/100 g H <sub>2</sub> O) |
|-------------|--------------------------------------------|-----------------------------------------|
| 278.15 K    | 0.0000                                     | 0.9343                                  |
| 278.15 K    | 0.2356                                     | 0.9513                                  |
| 278.15 K    | 0.4060                                     | 0.9580                                  |
| 278.15 K    | 0.6581                                     | 0.9937                                  |
| 278.15 K    | 0.8050                                     | 0.9574                                  |
| 278.15 K    | 1.0718                                     | 0.9411                                  |
| 278.15 K    | 1.3068                                     | 0.9920                                  |
| 278.15 K    | 1.4937                                     | 0.9900                                  |
| 278.15 K    | 1.8938                                     | 0.9846                                  |
| 278.15 K    | 2.0635                                     | 0.9780                                  |
| 278.15 K    | 2.2919                                     | 0.8154                                  |
| 278.15 K    | 2.3316                                     | 0.3102                                  |
| 278.15 K    | 2.3475                                     | 0.4568                                  |
| 278.15 K    | 2.3586                                     | 0.5776                                  |
| 278.15 K    | 2.3669                                     | 0.7244                                  |
| 278.15 K    | 2.4532                                     | 0.0000                                  |
| 288.15 K    | 0.0000                                     | 1.2721                                  |
| 288.15 K    | 0.0972                                     | 1.1918                                  |
| 288.15 K    | 0.5280                                     | 1.2227                                  |
| 288.15 K    | 0.7856                                     | 1.2146                                  |
| 288.15 K    | 0.9993                                     | 1.2255                                  |
| 288.15 K    | 1.4848                                     | 1.2372                                  |
| 288.15 K    | 1.5576                                     | 1.2405                                  |
| 288.15 K    | 1.9144                                     | 1.2394                                  |
| 288.15 K    | 2.2623                                     | 1.2539                                  |
| 288.15 K    | 2.3719                                     | 1.2212                                  |
| 288.15 K    | 2.5279                                     | 0.7146                                  |
| 288.15 K    | 2.5316                                     | 1.0592                                  |
| 288.15 K    | 2.5357                                     | 0.5265                                  |
| 288.15 K    | 2.5462                                     | 0.4005                                  |
| 288.15 K    | 2.5932                                     | 0.0000                                  |
| 288.15 K    | 2.5782                                     | 0.1331                                  |
| 288.15 K    | 2.5808                                     | 0.2861                                  |
| 288.15 K    | 2.5850                                     | 0.7261                                  |
| 288.15 K    | 2.5909                                     | 0.3534                                  |
| 288.15 K    | 2.6112                                     | 0.9541                                  |
| 288.15 K    | 2.6221                                     | 0.6268                                  |

|          |        |        |
|----------|--------|--------|
| 298.15 K | 0.0000 | 1.2909 |
| 298.15 K | 0.4783 | 1.1412 |
| 298.15 K | 0.7888 | 1.2987 |
| 298.15 K | 1.0623 | 1.2896 |
| 298.15 K | 1.1324 | 1.2923 |
| 298.15 K | 1.3779 | 1.2560 |
| 298.15 K | 1.8813 | 1.2723 |
| 298.15 K | 1.9797 | 1.2973 |
| 298.15 K | 2.1513 | 1.2336 |
| 298.15 K | 2.2353 | 1.2254 |
| 298.15 K | 2.5643 | 1.3345 |
| 298.15 K | 2.7532 | 0.8548 |
| 298.15 K | 2.8509 | 0.5292 |
| 298.15 K | 2.8946 | 0.2263 |
| 298.15 K | 2.9168 | 0.0000 |
| 308.15 K | 0.0000 | 1.6832 |
| 308.15 K | 0.2457 | 1.5758 |
| 308.15 K | 0.5749 | 1.4807 |
| 308.15 K | 0.5979 | 1.5697 |
| 308.15 K | 0.7061 | 1.5682 |
| 308.15 K | 0.9418 | 1.5614 |
| 308.15 K | 1.0915 | 1.5351 |
| 308.15 K | 1.4565 | 1.6189 |
| 308.15 K | 1.4907 | 1.5378 |
| 308.15 K | 1.7575 | 1.5418 |
| 308.15 K | 1.8966 | 1.5543 |
| 308.15 K | 2.0863 | 1.5752 |
| 308.15 K | 2.2532 | 1.5426 |
| 308.15 K | 2.4164 | 1.5738 |
| 308.15 K | 2.5966 | 1.5596 |
| 308.15 K | 2.8148 | 1.5765 |
| 308.15 K | 3.0180 | 1.5853 |
| 308.15 K | 3.0974 | 1.5929 |
| 308.15 K | 3.3940 | 1.3011 |
| 308.15 K | 3.4082 | 1.6081 |
| 308.15 K | 3.4651 | 0.6808 |
| 308.15 K | 3.5681 | 0.0000 |
| 308.15 K | 3.4721 | 0.5453 |
| 308.15 K | 3.4840 | 0.3480 |
| 308.15 K | 3.5022 | 0.9563 |
| 308.15 K | 3.5257 | 1.2017 |
| 308.15 K | 3.5225 | 0.7009 |
| 308.15 K | 3.5658 | 0.1514 |

|          |        |        |
|----------|--------|--------|
| 308.15 K | 3.6221 | 0.8822 |
| 318.15 K | 0.0000 | 2.0367 |
| 318.15 K | 0.2831 | 1.9598 |
| 318.15 K | 0.6748 | 1.9190 |
| 318.15 K | 0.9387 | 1.9497 |
| 318.15 K | 1.1118 | 1.9220 |
| 318.15 K | 1.2164 | 1.8719 |
| 318.15 K | 1.5343 | 1.9277 |
| 318.15 K | 2.0161 | 1.9922 |
| 318.15 K | 2.8852 | 1.9321 |
| 318.15 K | 3.1016 | 1.9440 |
| 318.15 K | 3.3634 | 1.9188 |
| 318.15 K | 3.5024 | 1.8842 |
| 318.15 K | 3.8191 | 1.9868 |
| 318.15 K | 3.8346 | 1.2906 |
| 318.15 K | 4.2066 | 0.0000 |
| 318.15 K | 4.1321 | 0.6090 |
| 318.15 K | 4.1839 | 0.3752 |
| 318.15 K | 4.2202 | 1.1066 |

## Uncertainty Analysis

According to the principle of solid-liquid equilibrium and experimental method, the main items leading to the error of mass fractions measurement include temperature and reagent purity. The Law of Error propagation is given in the following equation:

$$u_c(y) = \sqrt{\sum_{i=1}^N \left(\frac{\partial f}{\partial x_i}\right)^2 u^2(x_i) + 2 \sum_{i=1}^{N-1} \sum_{j=i+1}^N \left(\frac{\partial f}{\partial x_i}\right) \left(\frac{\partial f}{\partial x_j}\right) u(x_i, x_j)} \quad (S1)$$

where  $y$  is the output variable,  $x_i$  is the input variables,  $f$  refers to the function that relates the input and output variables,  $u_c(y)$  refers to the combined standard uncertainty of the output variable  $y$  and  $u(x_i)$  is the combined standard uncertainty of the input variable  $x_i$  and  $u(x_i, x_j)$  refers to covariance between two input variables  $x_i$  and  $x_j$ .

### (1) Temperature uncertainty

The measurement uncertainty  $u_{x,T}$  was calculated by following equation:

$$u_c(T) = \sqrt{u_{T,m}^2 + u_{T,a}^2} \quad (\text{S2})$$

$u_{T,m}$ ,  $u_{T,a}$  are the uncertainties of measurement and apparatus, respectively. The measurement uncertainty  $u_{T,m}$  was calculated by following equation:

$$u_{T,m} = \sqrt{\frac{1}{n(n-1)} \sum_{i=1}^n (T_i - \bar{T})^2} \quad (\text{S3})$$

where  $T_i$  is the measured value at time  $i$ ,  $\bar{T}$  is the average of all measured values, and  $n$  is the number of independent replications. The measurement of temperature was repeated at least three times, and the measurement uncertainty would be:

$$u_{T,m} = \sqrt{\frac{0.05^2 + 0.03^2 + 0.01^2}{3 * 2}} = 0.024 \text{ kPa} \quad (\text{S4})$$

The apparatus uncertainty  $u_{T,a}$  was calculated by:

$$u_{T,a} = \frac{e_a}{k_c} \quad (\text{S5})$$

where  $e_a$  is apparatus error, and  $k_c$  is the confidence coefficient, which is assumed to  $\sqrt{3}$  when the distribution of  $e_a$  is rectangular. As a result,  $u_{T,a}$  was calculated by:

$$u_{T,a} = \frac{0.07}{\sqrt{3}} = 0.040 \text{ kPa} \quad (\text{S6})$$

As a result, the temperature uncertainty  $u(T)$  was calculated to be:

$$u_c(T) = \sqrt{0.024^2 + 0.040^2} = 0.05 \text{ K} \quad (\text{S7})$$

## (2) Composition uncertainty

The measurement uncertainty  $u_{x,r}$  was calculated by following equation:

$$\frac{u_c(w)}{w} = \sqrt{\left(\frac{u_{w,T}}{T}\right)^2 + \sum \left(\frac{u_{w,r}}{r}\right)^2} \quad (\text{S8})$$

where  $T$  and  $r$  represent temperature and reagent purity,  $u_{w,T}$  and  $u_{w,r}$  are relevant uncertainties.

For example, for the mixture L-tryptophan + L-phenylalanine + H<sub>2</sub>O at 278.15 K in Table 3, the mass fraction is 0.00986.

The measurement uncertainty  $u_{w,T}$  was calculated by following equation:



$$\frac{u_{w,T}}{T} = \frac{0.05K}{278.15K} = 1.80e-04 \quad (S9)$$

The measurement uncertainty  $u_{w,r}$  was calculated by following equation:

$$\sum \left(\frac{u_{w,r}}{r}\right)^2 = \left(\frac{0.0003}{\sqrt{3} * 0.9997}\right)^2 + \left(\frac{0.0004}{\sqrt{3} * 0.9996}\right)^2 = 8.36e-06 \quad (S10)$$

The overall uncertainty of the composition measurement was:

$$\frac{u_c(w)}{w} = \sqrt{\left(\frac{u_{w,T}}{T}\right)^2 + \sum \left(\frac{u_{w,r}}{r}\right)^2} = 2.89e-04 \quad (S11)$$

$$u_c(w) = 0.003$$
